# Supplementary material
Source: PubMed Central journal article supplement (PMC8173833)
Supplement: NIHMS1700629-supplement-1.pdf [file NIHMS1700629-supplement-1.pdf]

## 1 Supplementary data

### 2 Supplementary Figure legends

3 Fig. S1. Structural comparison of the *Xl*Nse1-3-4 complex and the *Hs*Nse1-Nse3 complex.

4 (a) Structural comparison of the *Xl*Nse1-3-4 and *Hs*Nse1-Nse3 by aligning Nse1 (orange).  
 5 Nse3 and Nse4 are colored green and blue, respectively. The *Xl*Nse1-3-4 structure is similar to  
 6 the closed form of *Hs*Nse1-Nse3 (PDB 3NW0), in which the WHA and WHB of Nse3 are  
 7 located close to each other. In the open form of *Hs*Nse1-Nse3 (PDB 5HVQ), the WHA and  
 8 WHB of Nse3 are distantly located.

9 (b) The extended L2'' loop of Nse4 (blue) passes through the interface between Nse1 (orange)  
 10 and Nse3 (green). The L2'' loop enters a channel formed by the L1A' loop, the S2A' and S3A'  
 11 strands, the H1B' and H4B' helices, and the WHA-WHB linker of Nse3 (left), and exits a  
 12 channel formed by the S3A strand; the H1B, H3B, and H4B helices; the L3B loop; and a WHA-  
 13 WHB linker of Nse1 (right).

14

15 Fig. S2. Structure-based sequence alignment of KITE proteins Nse1, ScpB and MukE. Highly  
 16 conserved and moderately conserved residues are highlighted in orange and light orange,  
 17 respectively. Helices and strands are indicated as cylinders and arrows, respectively. The  
 18 segments lacking the regular secondary structure are represented as solid lines. The secondary  
 19 structures of *Ec*MukE are indicated as solid lines below its sequence. Residues involved in  
 20 DNA binding are highlighted with red stars [1], and residues binding Nse4 and Zn ions are  
 21 marked by blue or black circles, respectively. The green circle indicates the Nse3-binding  
 22 residues in previous yeast-two hybrid analysis [2]. Every 10 residues of *Xl*Nse1 are marked by  
 23 vertical bar. PROMALS3D was used for alignment of Nse1 from frog (*Xenopus laevis*, Uniprot  
 24 entry: Q6PAF4), budding yeast (*Saccharomyces cerevisiae*, Q07913), fission yeast  
 25 (*Schizosaccharomyces pombe*, Q53EK2), human (*Homo sapiens*, Q8WV22), cow (*Bos Taurus*,  
 26 Q3T0X7), pig (*Sus scrofa*, A0A286ZS01), mouse (*Mus musculus*, A0A0R4J0C0), chicken  
 27 (*Gallus gallus*, E1BWX7), fruit fly (*Drosophila melanogaster*, Q9VMA0), ScpB from Bs  
 28 (*Bacillus subtilis*, P35155), Gs (*Geobacillus stearothermophilus*, A0A0K2HBM0), Pf  
 29 (*Pyrococcus furiosus*, A0A5C0XSN0), Sp (*Streptococcus pneumonia*, Q97NX6) and Ec  
 30 (*Escherichia coli*) MukE (P22524).

31

32 Fig. S3. Structure-based sequence alignment of KITE proteins Nse3, ScpB and MukE.  
 33 Residues involved in DNA binding are highlighted with red stars [1]. Residues involved in  
 34 Nse4 binding are colored blue (this study) or represented by yellow circles from Y2H [3]. The  
 35 black and green indicates the mutation sites that increase sensitivity to DNA damage agents [3,  
 36 4]. PROMALS3D was used for alignment of Nse1 from frog (*Xenopus laevis*, A0A1L8G3Z0),  
 37 budding yeast (*Saccharomyces cerevisiae*, Q05541), fission yeast (*Schizosaccharomyces*  
 38 *pombe*, Q9Y7U4), human (*Homo sapiens*, Q96MG7), cow (*Bos Taurus*, Q0D253), pig (*Sus*  
 39 *scrofa*, F1SNQ4), mouse (*Mus musculus*, Q9CPR8), chicken (*Gallus gallus*, Q001T8), fruit fly  
 40 (*Drosophila melanogaster*, Q9VMA0), ScpB from Bs (*Bacillus subtilis*, P35155), Gs  
 41 (*Geobacillus stearothermophilus*, A0A0K2HBM0), Pf (*Pyrococcus furiosus*, A0A5C0XSN0),  
 42 Sp (*Streptococcus pneumonia*, Q97NX6) and Ec (*Escherichia coli*) MukE (P22524).

43

44 Fig. S4. Structure-based sequence alignment of kleisin proteins Nse4 and ScpA. Disordered  
 45 regions are illustrated as dotted lines. The N-terminal HTH motif and C-terminal WH domain  
 46 are boxed. Residues involved in DNA binding are highlighted by red stars. Residues binding  
 47 Nse1 or Nse3 are marked by yellow or green circles, respectively. The black circles indicate  
 48 the Nse3-binding residues in previous studies [5]. The  $\Delta$  indicates deletion of the marked region,  
 49 which impaired the interaction of Nse4 with Nse3 in fission yeast [2]. PROMALS3D was used  
 50 for alignment of Nse1 from frog (*Xenopus laevis*, B1WBD6), budding yeast (*Saccharomyces*  
 51 *cerevisiae*, P43124), fission yeast (*Schizosaccharomyces pombe*, Q6BDR8), human (*Homo*  
 52 *sapiens*, Q8N140), cow (*Bos taurus*, A6QPC8), pig (*Sus scrofa*, I3L6I0), mouse (*Mus musculus*,  
 53 Q3V124), chicken (*Gallus gallus*, F1NV66), and fruit fly (*Drosophila melanogaster*,  
 54 Q9VKV4), and ScpB from Bs (*Bacillus subtilis*, P35154), Gs (*Geobacillus stearothermophilus*,  
 55 A0A0K2HBN1), Pf (*Pyrococcus furiosus*, Q8TZY3) and Sp (*Streptococcus pneumonia*,  
 56 Q97NX5).

57

58 Fig. S5. The interfaces between Nse4 and the Nse1-Nse3 complex

59 (a) The first interface between the H1'' helix of Nse4 (blue) and WHB of Nse3 (green) in same  
 60 view of Fig. 3b. The H1'' helix of Nse4 is surrounded by the H1B', H2B' and H5B' helices of

61 Nse3.

62 (b) The second interface between the H2'' helix of Nse4 (blue) and the H1B' and H5B' helices  
63 of Nse3 (green) in same view of Fig 3c.

64 (c) The third interface between Nse4 (the extended loop) and the Nse1-Nse3 complex in same  
65 view of Fig. 3d.

66

67 Fig. S6. Comparison of the Nse1-3-4 complex with ScpAB and MukEF.

68 (a) Cylinder representation of *Sp*ScpAB. The WHA of ScpB (orange) is aligned with WHA of  
69 *Xl*Nse1 in Fig. 4a. The H5 helix of ScpA (blue) which is not observed in Nse1-3-4 complex or  
70 MukEF passes through the groove formed by H1B, H4B and H5B of ScpB (orange and  
71 magenta) and H3B' of ScpB' (white).

72 (b) Surface representation of *Sp*ScpAB in same view with (a). The helices of ScpB (light orange)  
73 and ScpB' (white) equivalent to the helices of Nse1 and Nse3 are shown in red and black  
74 cylinder, respectively. ScpA is colored blue. The WHB C-terminal extension of both ScpB and  
75 ScpB' are colored magenta.

76 (c) Close-up view of the *Sp*ScpA (blue)-ScpB' (white) interface. A long helix of ScpA is  
77 perpendicular to the H1B' helix of ScpB'.

78 (d) Close-up view of the path of the L2'' loop of Nse4 (blue). The loop passes through the  
79 interface of Nse1 (orange)-Nse3 (white).

80 (e) Close-up view of the path of the loop in *Gs*ScpA equivalent to the L2'' loop of Nse4. WHA  
81 of ScpB' (white) is aligned with WHA of Nse3 in (d).

82 (f) Close-up view of the path of the loop in *Sp*ScpA equivalent to the L2'' loop of Nse4.

83 (g) Close-up view of the path of the loop in *Ec*MukF equivalent to the L2'' loop of Nse4. WHA  
84 of MukE' (white) is aligned with WHA of Nse3 in (d).

85

86 Fig. S7. A model of the N-terminal region of Nse4

87 (a) A model of Nse4ML C-tail (residues 187 to 211) of Nse4 based on the ScpAB structure

88 (PDB 3W6J) [6]. Nse1, Nse3 and Nse4 are colored bright orange, white and blue, respectively.  
 89 In the structural alignment of WHA of Nse3 and ScpB', the C-terminal region of *GsScpA*  
 90 (green) collides with the H1B' and H3B' helices of Nse3. The green helix moves toward the  
 91 cyan helix (indicated by an arrow) to mimic the H6 helix in *GsScpA* (or the H5 helix of *Sp*  
 92 *ScpA*). The Nse4ML C-tail (cyan) is located in a groove formed by two WHBs of Nse1 and  
 93 Nse3. All dotted lines indicate crosslinks of the residues from CL-MS<sup>NSE</sup> [7]. However, in a  
 94 model shown here, the C $\alpha$  atoms connected by the dotted lines are separated over 30 Å.  
 95 Residues in human Nse3, and Nse4 equivalent to those of *X/NSE* proteins are marked inside  
 96 the parenthesis.

97 (b) Model of the N-terminal region of Nse4 (residues 30 to 104) and Nse4ML C-tail (residues  
 98 187 to 211) based on CL-MS<sup>NSE</sup>. Nse1 (bright orange), Nse3 (white), and Nse4 (blue) are  
 99 shown in cylinder representation. The modelled N- and C-terminal regions are colored cyan.  
 100 Residues in human Nse3, and Nse4 equivalent to those of *X/NSE* proteins are marked inside  
 101 the parenthesis. Yellow and blue spheres indicates the crosslinking range of Lys160 and Glu231  
 102 of Nse3, respectively. Lys100 of Nse4 is likely to be within the overlapping region of two  
 103 spheres. Lys100 of Nse4 is within crosslinking distance of Lys160 and Glu231 of Nse3 in our  
 104 model (solid line).

105

106 Fig. S8. DNA-binding of various forms of the *X/Nse1-3-4* complex.

107 (a) Analysis of DNA binding between various Nse1-3-4 complexes and a 5'-FAM-labelled 37  
 108 bp dsDNA. Numbers at the top of the gels indicate the Nse4 constructs used for analysis. Nse1  
 109 (residues 3 to 248) and Nse3 (residues 45 to 260) were used for all DNA-binding analyses.  
 110 Each protein was incubated with 5'-FAM-labelled 37 bp dsDNA (0.2 μM) for 30 min on ice  
 111 with increasing molar concentrations of proteins. The protein molar concentration (0.2 ~ 45  
 112 μM) are indicated at the top of each gel. On top, cartoons show Nse1 (orange), Nse3 (green)  
 113 and Nse4 (blue).

114 (b) Analysis of DNA binding between Nse1-3-4 complexes containing Nse3 or Nse4 mutants  
 115 and a 5'-FAM-labelled 37 bp dsDNA. Nse1 (residues 3 to 248), Nse3 (residues 45 to 260), and  
 116 Nse4 (residues 30 to 220) constructs were used for all mutants. Reaction conditions were the  
 117 same as in (a). Nse3 mutant, K187E/K195E; Nse4 N mutant, R33E/R35E/R38E/R52E; Nse4

118 C1 mutant, K187E/K198E/K211E; Nse4 C2 mutant, R192E/K194E/R195E; Nse4 C3 mutant,  
119 C1+C2.

120 (c) Electrostatic surface potential representation of the DNA-bound Nse1-3-4 model. The  
121 electrostatic potential was calculated by APBS [8] and displayed using Pymol. Positively and  
122 negatively charged regions are colored blue and red, respectively.

123 (d) Analysis of DNA binding between the Smc6 (residues 85 to 299 and 925 to 1107)-Nse1  
124 (residues 3 to 248)-Nse3 (residues 45 to 260)-Nse4 (residues 30 to 183, left or 30 to 220, right)  
125 complex and a 5'-FAM-labelled 37 bp dsDNA. Reaction conditions were the same as those in  
126 (a).

127 (e) Analysis of DNA binding between the Smc6 (residues 85 to 299 and 925 to 1107)-Nse1  
128 (residues 3 to 248)-Nse3 (residues 45 to 260)-Nse4 (residues 30 to 220) complex containing a  
129 single mutation of Nse4 and a 5'-FAM-labelled 37 bp dsDNA.

130

131 Fig. S9. A model for the Nse1-3-4 complex engaging with the Smc5/6 head regions in the  
132 nucleotide-free state.

133 (left) Models of Smc5 (pink N-lobe and magenta C-lobe domain) and Smc6 (white N-lobe and  
134 gray C-lobe) head domains (ATP-free state) generated by Phyre2 using the structure of  
135 condensin (PDB 6YVU) [9, 10]. Residues crosslinking Smc5 and Smc6 are shown as spheres  
136 in the circle, and all distances between these residues are shorter than 27 Å [7]. Residues in  
137 Smc5 and Smc6 that crosslink with the Nse1-3-4 complex are shown as yellow spheres. (right)  
138 Structure of the Nse1-3-4 complex in cylinder representation showing Nse1 (orange), Nse3  
139 (green), and Nse4 (blue). Ser241 and Gln248 of Nse1 (yellow spheres) are positioned between  
140 the WHA and WHB of Nse1. The crosslinked residues between Smc5/6 and the Nse1-3-4  
141 complex are connected by dashed lines [7]. Residues in human Nse1, Nse3, and Nse4  
142 equivalent to those of *X/NSE* proteins are marked inside the parenthesis.

143

144 Fig. S10. A model of the SMC5/6 complex bound to ATP and DNA.

145 (a) Structure-based sequence alignment of kleisin N-tails in cohesin, condensin, SMC5/6, and  
146 bacterial SMC complexes. The alignment is centered on the first helix (NH1) of the HTH motif

147 of kleisin. The conserved hydrophobic residues in the NH1 helix and the positively charged  
 148 residues are highlighted in yellow and blue, respectively. The mutated residues of Nse4 in the  
 149 EMSA analysis are indicated with red stars above residues.

150 (b-c) Structural representation of kleisin N-tails in two different DNA-bound cohesin structures.  
 151 (b) *HsRad21* (magenta); (c) *SpRad21* (cyan). The residues equivalent to Arg52 and Arg38 of  
 152 Nse4 are shown as spheres in *HsRad21* (Lys25 and Arg11) and *SpRad21* (Lys25 and Lys11).  
 153 Arg33 and Arg35 of Nse4 and their equivalent residues in *SpRad21* follow the opposite  
 154 direction to DNA, and the equivalent residues are disordered in *HsRad21*. DNA and SMC are  
 155 colored light brown and white, respectively.

156

## 157 **Supplementary information related to Fig. S9**

### 158 **A model of the Smc5-Smc6 head regions bound with Nse1-3-4**

159 Using the structures of the Nse1-3-4 complex and condensin (PDB 6YVU) [10], and  
 160 the CL-MS data [7], we built a model for the Smc5/6 complex in the ATP-free state. In the CL-  
 161 MS experiment, in which full-length human Smc5, Smc6 and the Nse1-3-4 complex were  
 162 crosslinked in the absence of ATP and DNA (referred to as CL-MS<sup>SMC-NSE</sup>), the majority of  
 163 crosslinks occur at the interfaces between Smc5 and Smc6 arms. Thus, Smc5/6 may adopt a  
 164 rod-like shape. We built the Smc5 and Smc6 heads using Phyre2 [9] based on the structure of  
 165 condensin (PDB 6YVU). In the CL-MS<sup>SMC-NSE</sup> data, Lys245 and Tyr246 in *XlSmc6* crosslinked  
 166 with Asn168 and Ser170 in *XlSmc5*. We modelled the Smc5/6 heads so that residues could be  
 167 located 24–27 Å apart (Fig. S9, left circle).

168 In the CL-MS<sup>SMC-NSE</sup> data, most of the crosslinks between SMC and Nse1-3 occur  
 169 between the Smc6 N-lobe and the Nse1 C-terminus. Because Ser241 and Gln248 of *XlNse1*  
 170 that crosslinked with Smc6 are disordered in our structure, we predicted the position of the two  
 171 residues from CL-MS<sup>NSE</sup> data. We placed Ser241 and Gln248 of *XlNse1* within 20 Å from the  
 172 C $\alpha$  atoms of their crosslinking residues (Arg28, Lys151, Arg156, Thr161, Lys212, and Gln248  
 173 for Ser241; Arg28, Lys151, Ser160, Thr161 for Gln248) as shown in the spheres in Figure S9.  
 174 Next, we docked the Nse1-3-4 complex with the Smc5-Smc6 heads by locating the Nse1 C-  
 175 terminus near the Smc6 N-lobe (Lys146, Lys150, Lys194), positioning Glu177 of Nse3 near  
 176 Smc5 (Lys171), and Nse4 (Gln156, Ser160) near Smc6 (Lys146) (Fig. S9). All crosslinking

177 residues are within 30 Å.

178 In a model of the ATP-free SMC-NSE complex, the WHA and WHB of Nse1 are  
 179 located close to the SMC head. The WHB of Nse3 is nearer the SMC head domain than WHA,  
 180 hence the H1'' helix of Nse4M may be located in close proximity to the HTH motif, which  
 181 binds to the neck of Smc6 (Fig. 7c). We modelled the N-terminal HTH motif (PDB 3W6J) [6]  
 182 and the C-terminal WH domain (PDB 4I99) [11] of Nse4 using Phyre2, and placed them near  
 183 the neck of Smc6 and the head of Smc5, respectively, by structurally aligning with Brn1 in the  
 184 budding yeast condensin complex (PDB 6YVU). The HTH motif (residues 30 to 104) and  
 185 Nse4M (residues 108 to 181) can be connected by a three residues linker, whereas the WH  
 186 domain (residues 219 to 289) and Nse4M can be connected by a 37-residues linker in our model  
 187 (Fig. 7c).

188

## 189 References

- 190 1. Zabradý, K., Adamus, M., Vondrova, L., Liao, C., Skoupilova, H., Novakova, M., et al., (2016).  
 191 Chromatin association of the SMC5/6 complex is dependent on binding of its NSE3 subunit to  
 192 DNA. *Nucleic Acids Res.*, **44**, 1064–1079.
- 193 2. Vondrova, L., Kolesar P., Adamus, M., Nociar, M., Oliver, A.W., Palecek, J.J., (2020). A role  
 194 of the Nse4 kleisin and Nse1/Nse3 KITE subunits in the ATPase cycle of SMC5/6. *Sci. Rep.*,  
 195 **10**, 9694.
- 196 3. Hudson, J.J.R., Bednarova, K., Kozakova, L., Liao, C., Guerineau, M., Colnaghi, R., et al.,  
 197 (2011). Interactions between the Nse3 and Nse4 components of the SMC5-6 complex identify  
 198 evolutionarily conserved interactions between MAGE and EID families. *PLoS One*, **6**, e17270.
- 199 4. Serrano, D., Cordero, G., Kawamura, R., Sverzhinsky, A., Sarker, M., Roy, S., et al., (2020).  
 200 The Smc5/6 Core Complex Is a Structure-Specific DNA Binding and Compacting  
 201 Machine. *Mol. Cell*, **80**, 1025–1038.e5.
- 202 5. Guerineau, M., Kriz, Z., Kozakova, L., Bednarova, K., Janos, P., Palecek, J.J., (2012). Analysis  
 203 of the Nse3/MAGE-binding domain of the Nse4/EID family proteins. *PLoS One*, **7**, e35813.
- 204 6. Kamada, K., Miyata, M., Hirano, T., (2013). Molecular basis of SMC ATPase activation: role  
 205 of internal structural changes of the regulatory subcomplex ScpAB. *Structure*, **21**, 581–594.
- 206 7. Adamus, M., Lelkes, E., Potesil, D., Ganji, S.R., Kolesar, P., Zabradý, K., et al, (2020).

- 207 Molecular insights into the Architecture of the human SMC5/6 complex. *J. Mol. Biol.*, **432**,  
208 3820–3837.
- 209 8. Baker, N.A., Sept, D., Joseph, S., Holst, M. J., McCammon, J.A., (2001). Electrostatics of  
210 nanosystems: application to microtubules and the ribosome. *Proc. Natl. Acad. Sci. U.S.A.*, **98**,  
211 10037–10041.
- 212 9. Kelley, L.A., Mezulis, S., Yates, C.M., Wass, M.N., Sternberg, M.J., (2015). The Phyre2 web  
213 portal for protein modeling, prediction and analysis. *Nat. Protoc.*, **10**, 845–858.
- 214 10. Lee, B.G., Merkel, F., Allegretti, M., Hassler, M., Cawood, C., Lecomte, L., et al., (2020).  
215 Cryo-EM structures of holo condensin reveal a subunit flip-flop mechanism. *Nat. Struct. Mol.*  
216 *Biol.*, **27**, 743–751.
- 217 11. Bürmann, F., Shin, H.C., Basquin, J., Soh, Y.M., Giménez-Oya, V., Kim, Y.G., et al., (2013).  
218 An asymmetric SMC-kleisin bridge in prokaryotic condensin. *Nat. Struct. Mol. Biol.*, **20**, 371–  
219 379.
- 220



## Supplementary Table

**Table S1.** Yeast strains used in this study

| <b>Name</b> | <b>Genotype</b>                                                         |
|-------------|-------------------------------------------------------------------------|
| T275-2      | <i>NSE4-13myc::HIS3</i>                                                 |
| T2186-7-1A  | <i>nse4-H275E-13myc::HIS3</i>                                           |
| T2187-45-1A | <i>nse4-R257E,H275E-13myc::HIS3</i>                                     |
| T2191-27    | <i>nse4-R251E,R256E,R257E,R258E,H275E,S276E-13myc::HIS3/+</i>           |
| T2191-36    | <i>nse4-K49E,R65E,R251E,R256E,R257E,R258E,H275E,S276E-13myc::HIS3/+</i> |
| X8563       | <i>NSE4-13myc::HIS3/+</i>                                               |

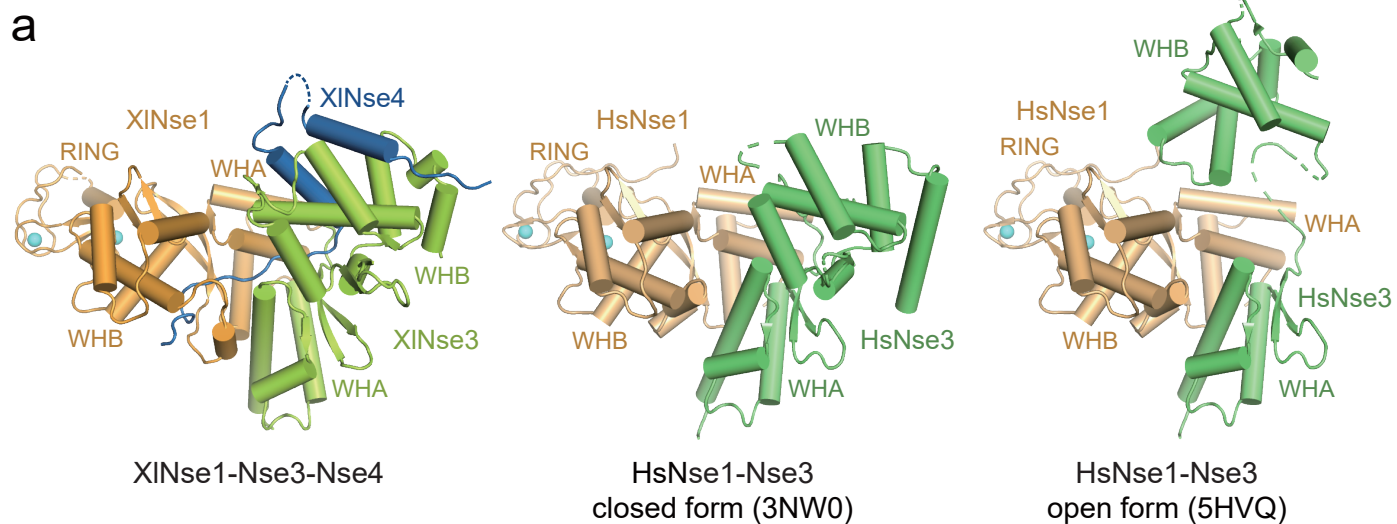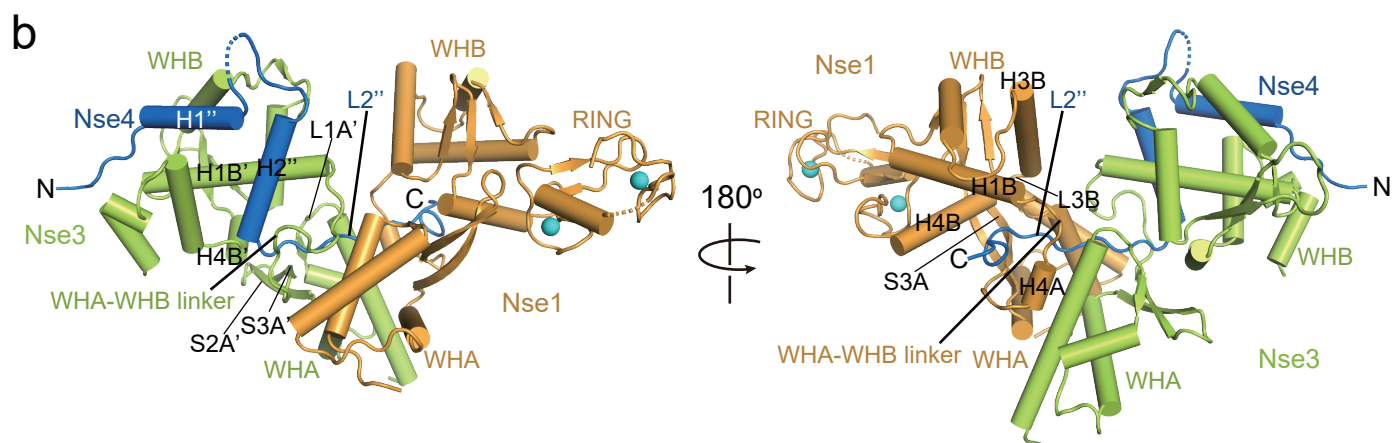

Figure S1

NSE1

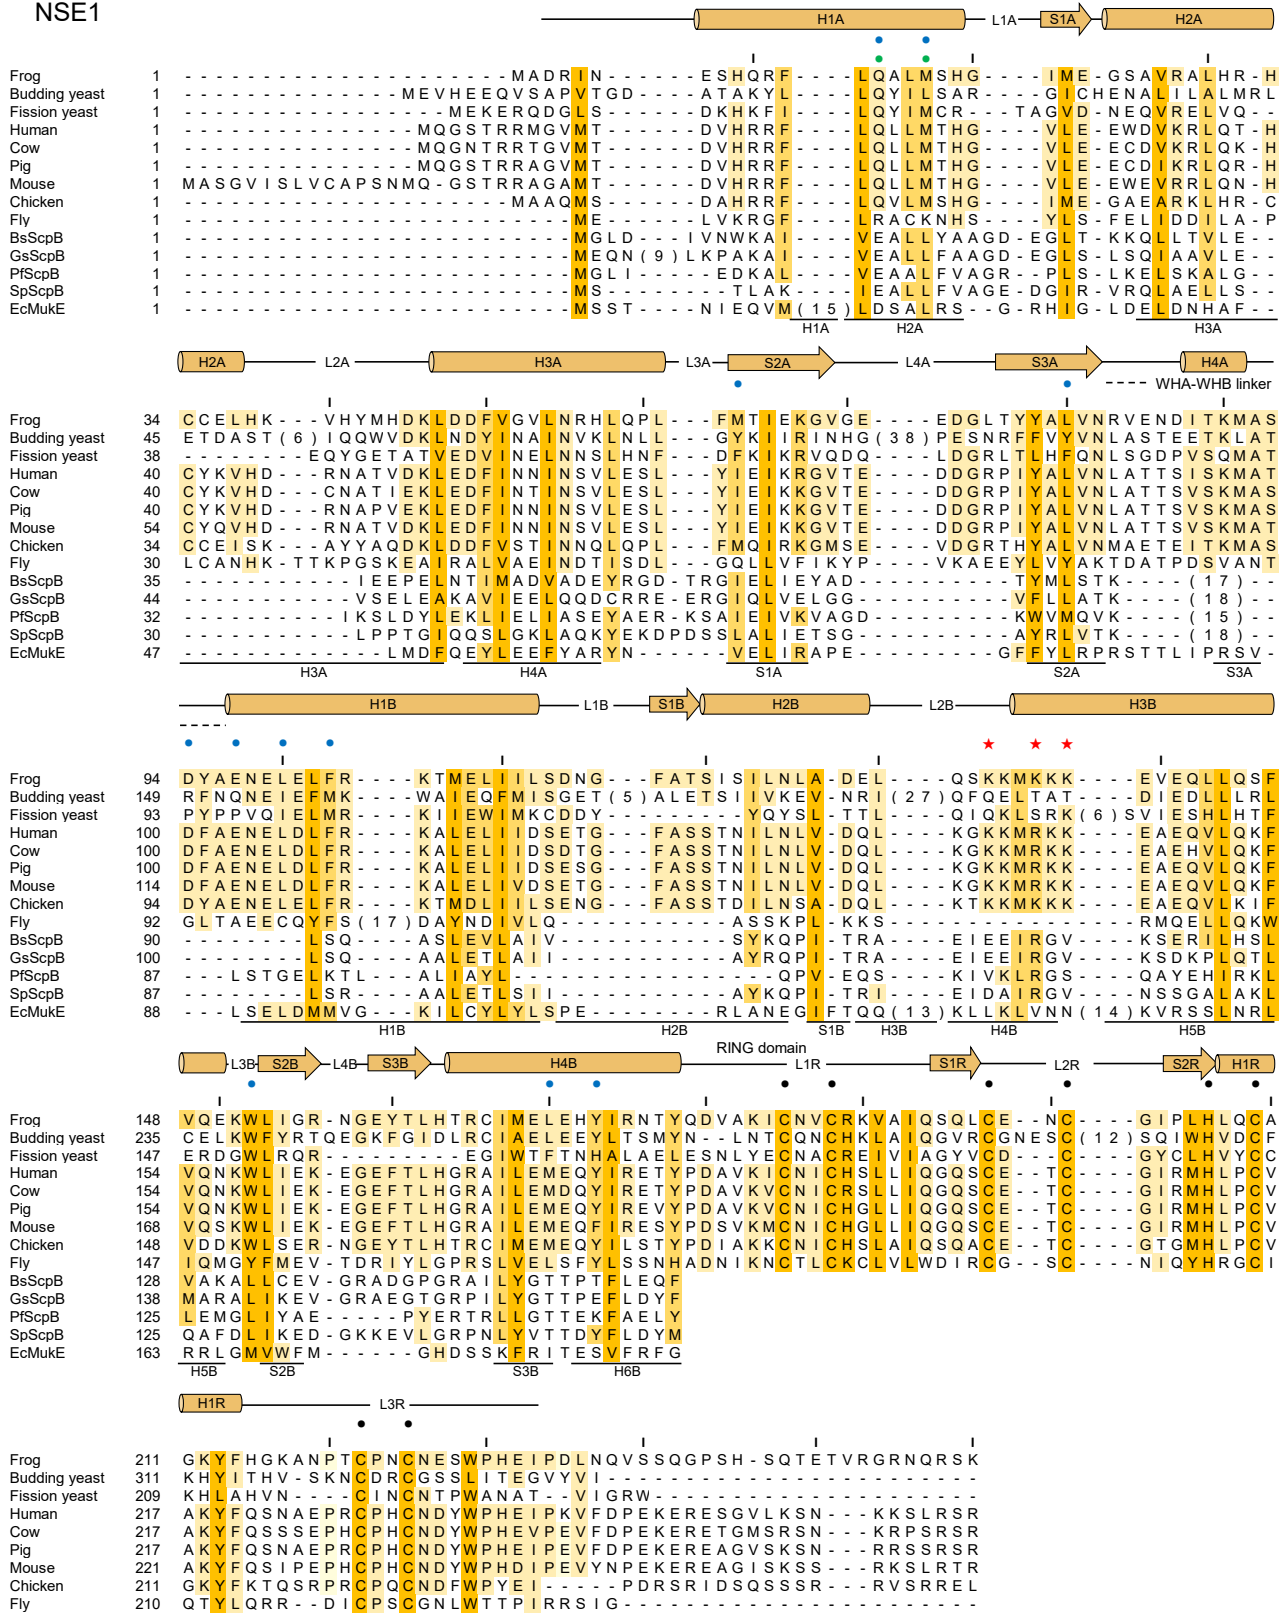

Figure S2

NSE3

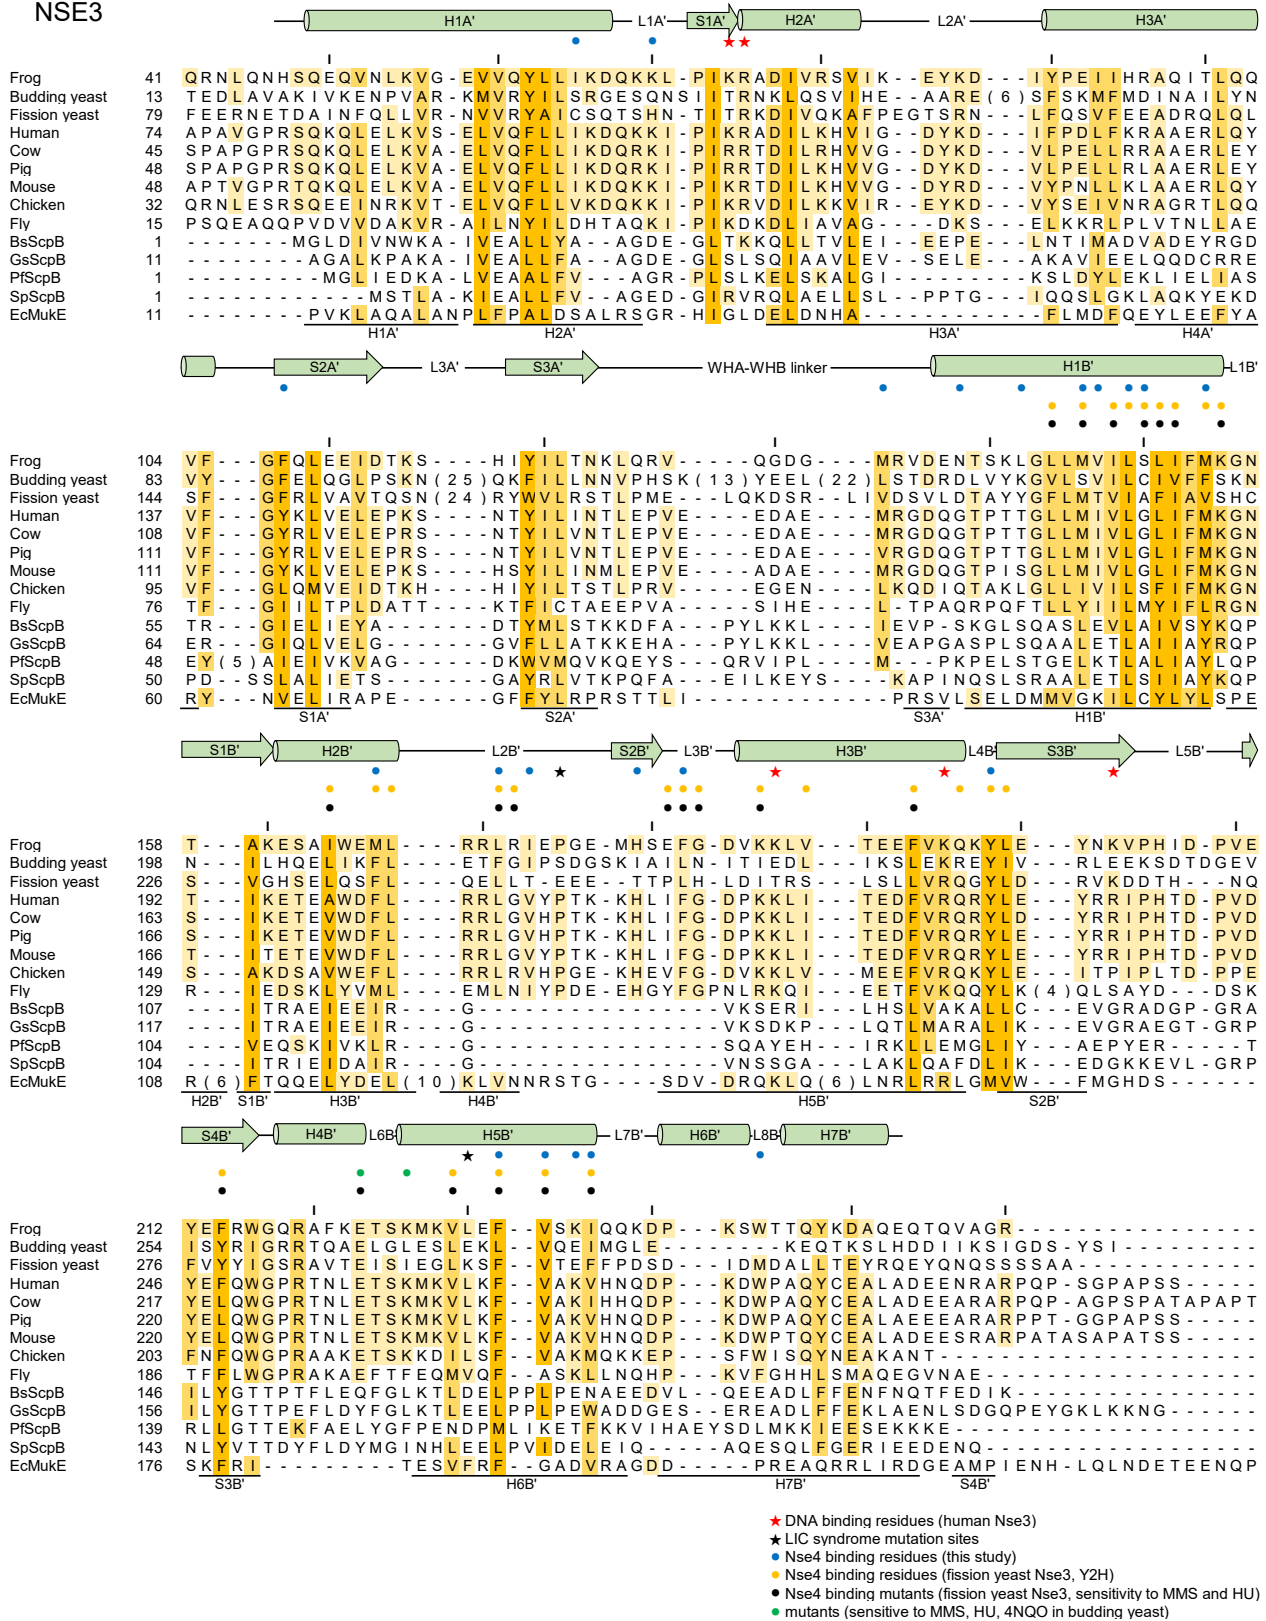

Figure S3

NSE4

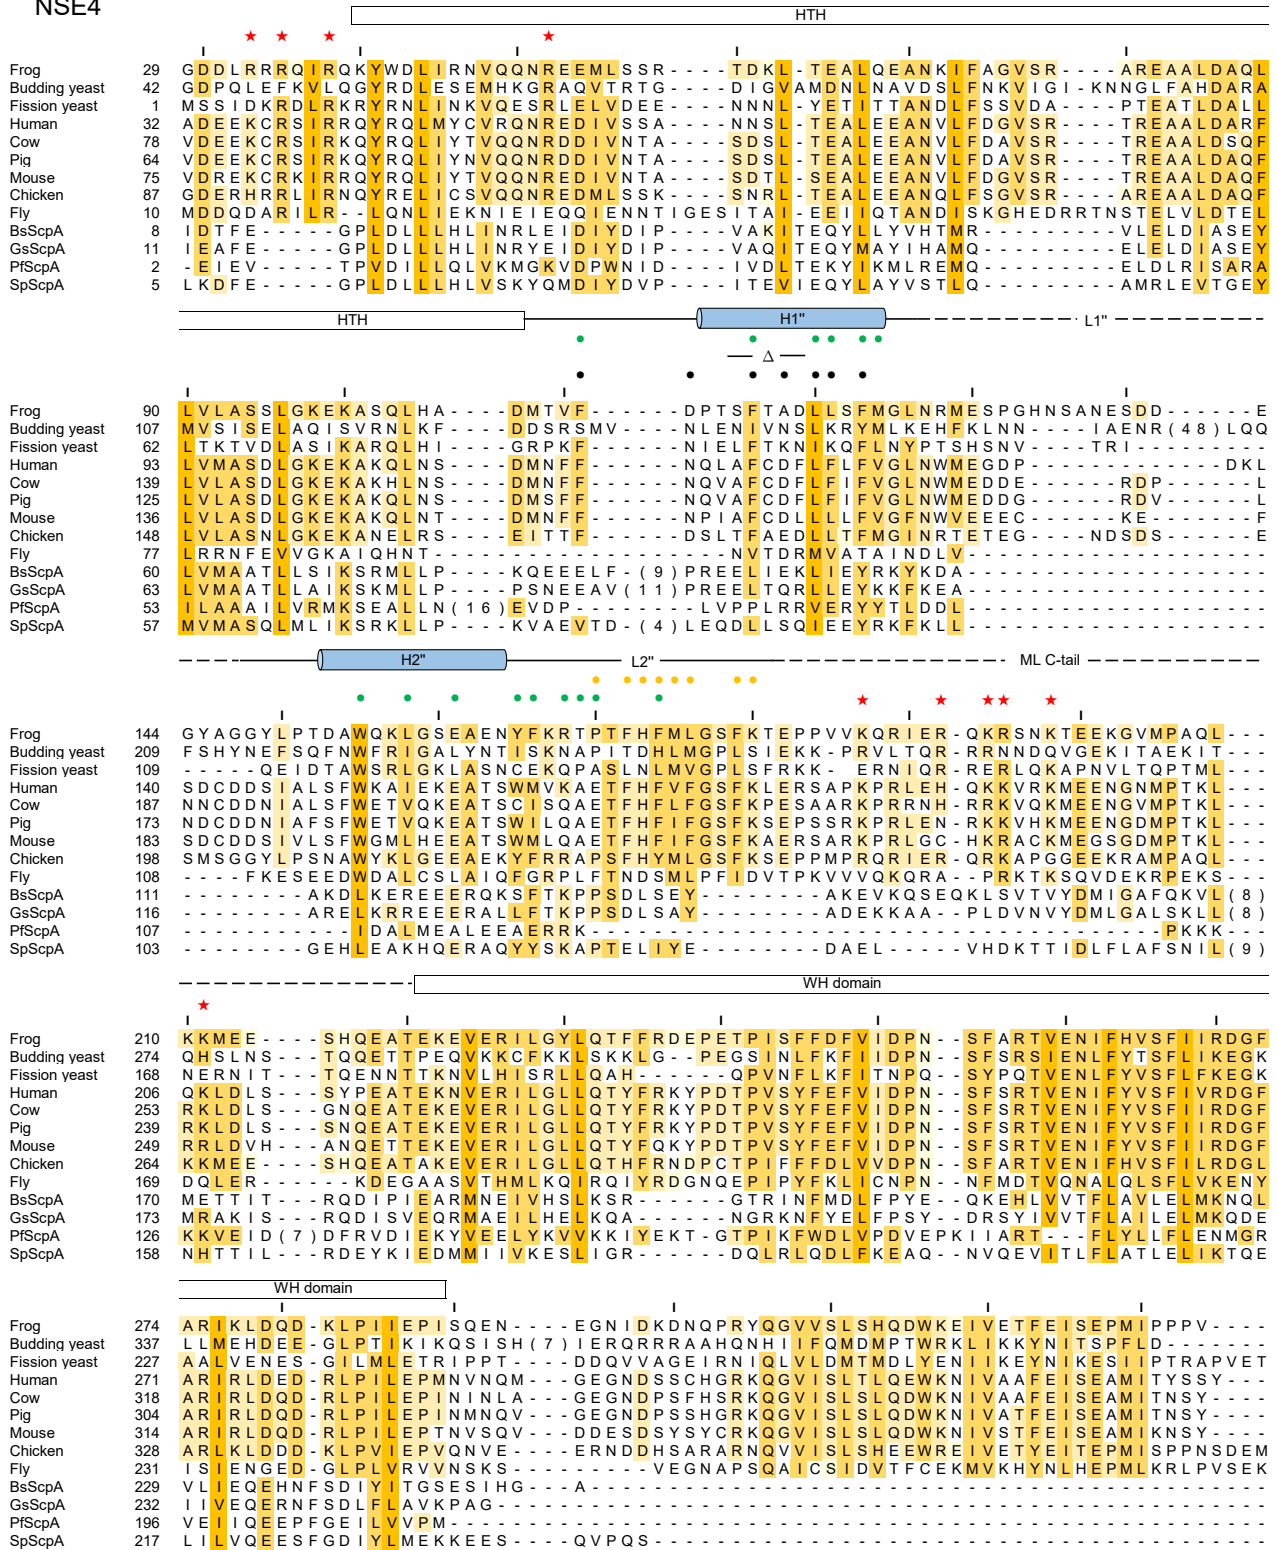

★ DNA binding mutant (this study)  
 ● Nse1 binding residues (this study)  
 ● Nse3 binding residues (this study)  
 ● Nse3 binding mutants (human Nse4b, Y2H)  
 △: Nse3 binding residues (fission yeast, Y2H)

Figure S4

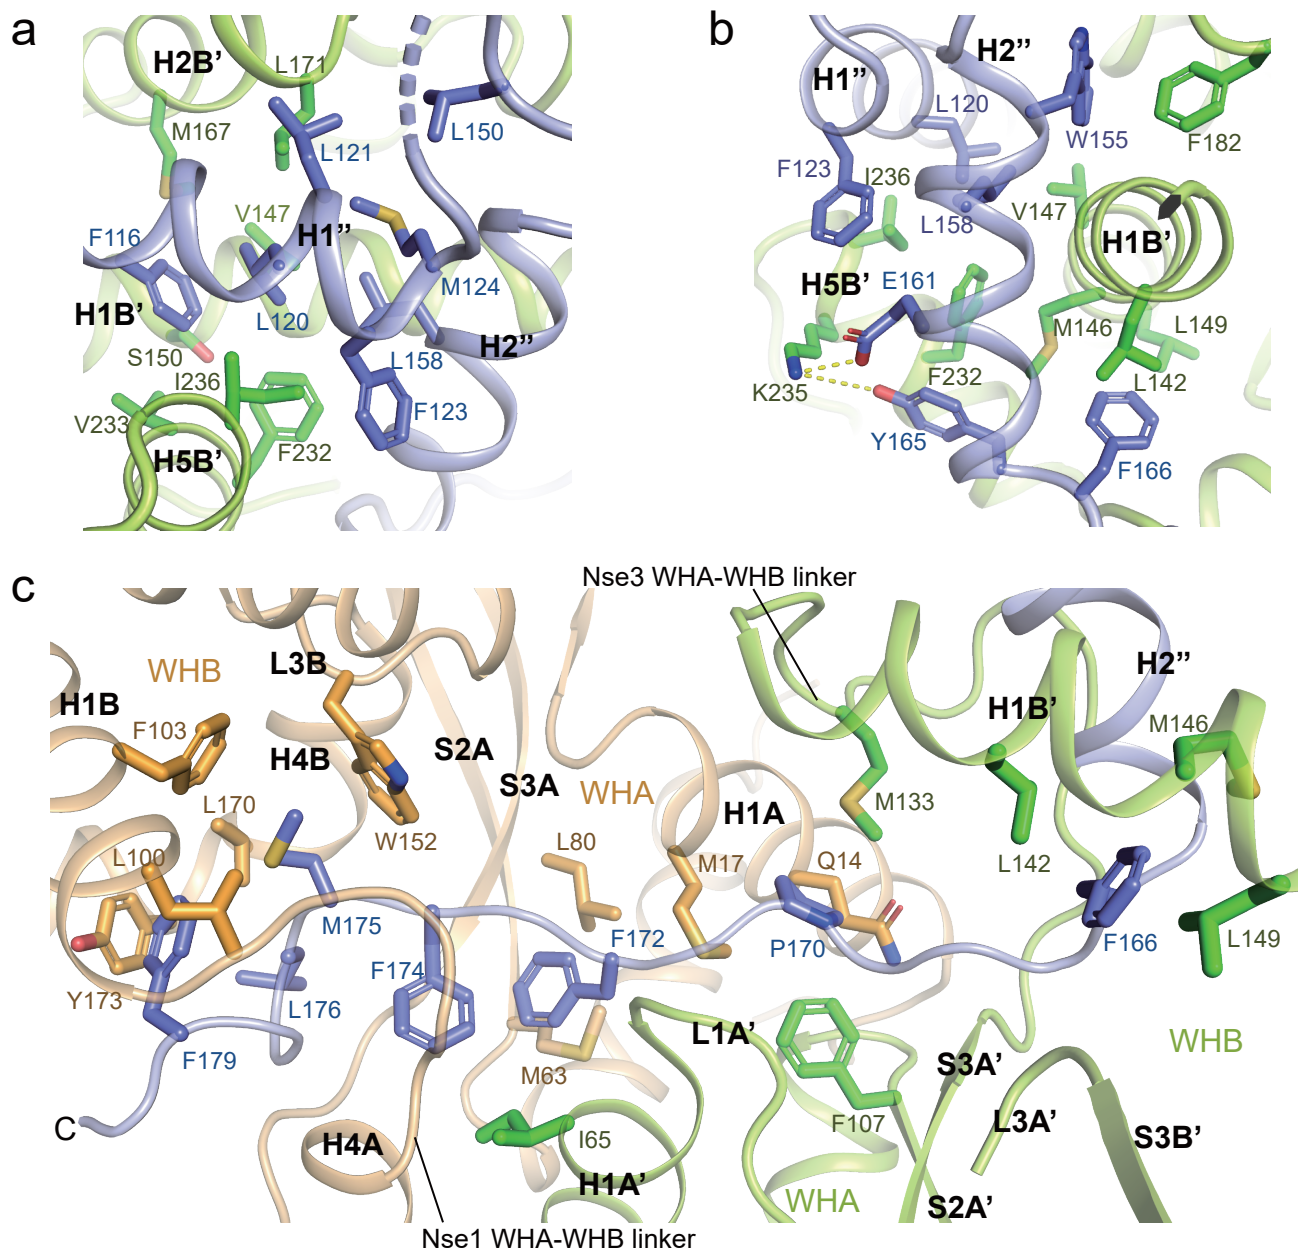

Figure S5

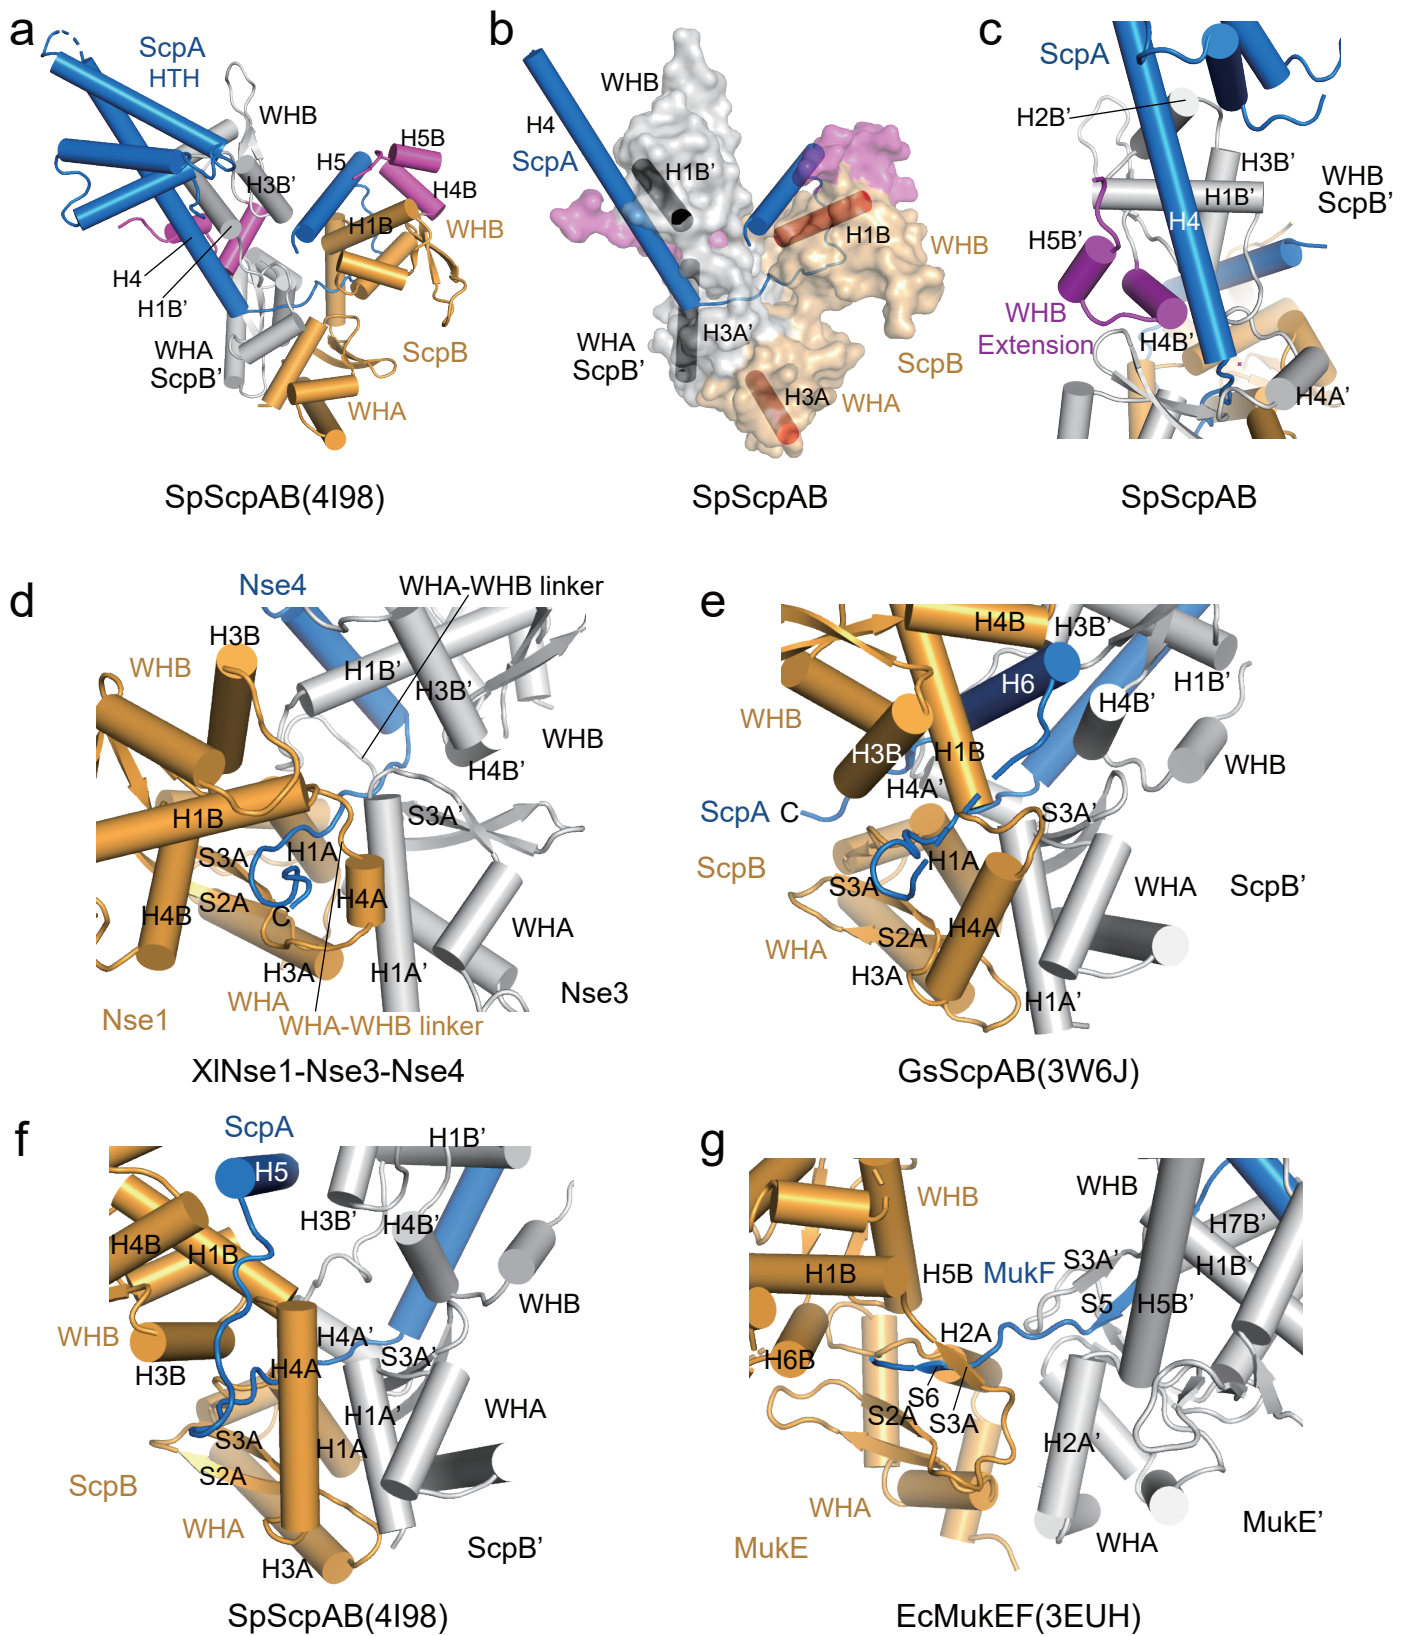

Figure S6

**a** Nse1-Nse3-Nse4

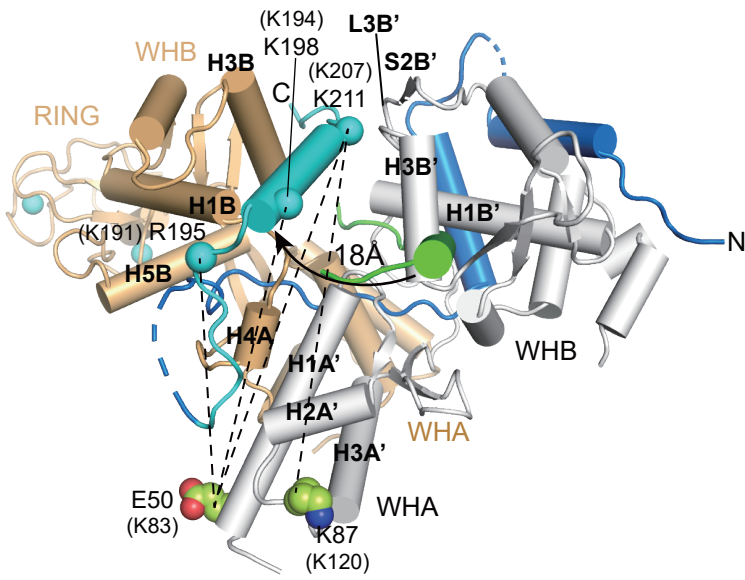

**b** Nse1-Nse3-Nse4

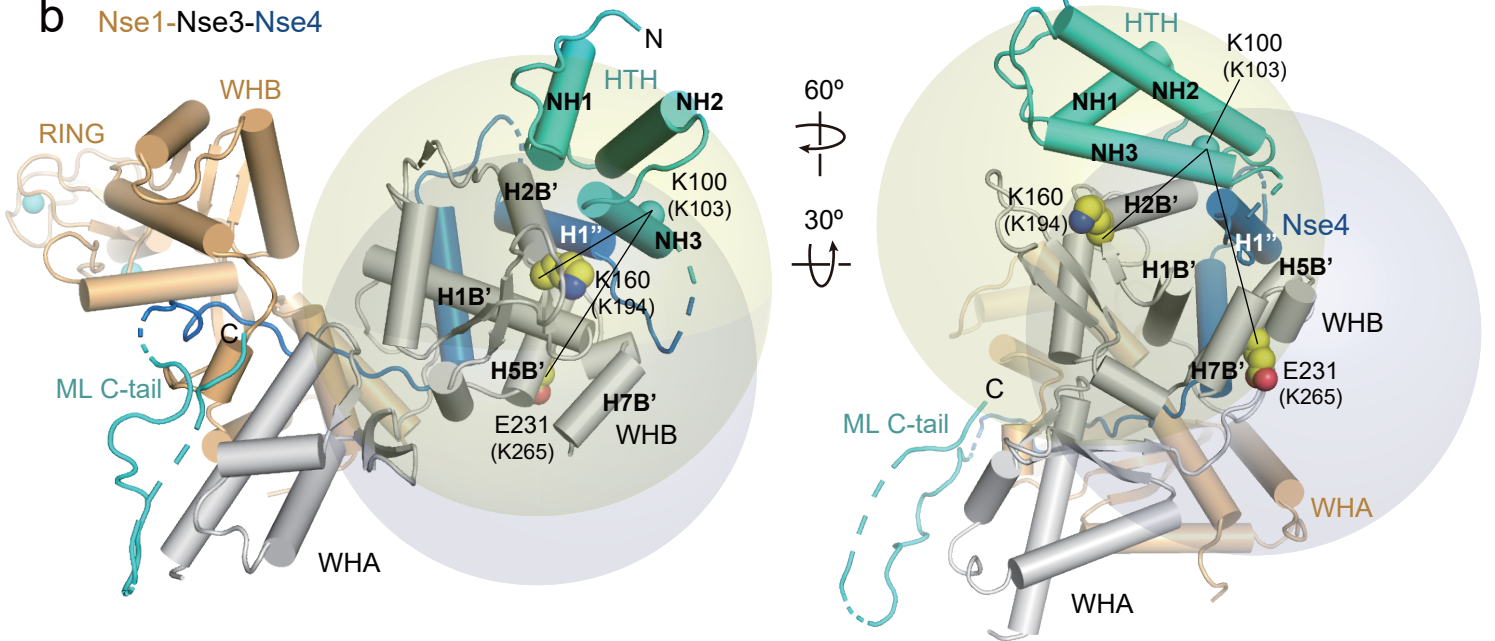

Figure S7



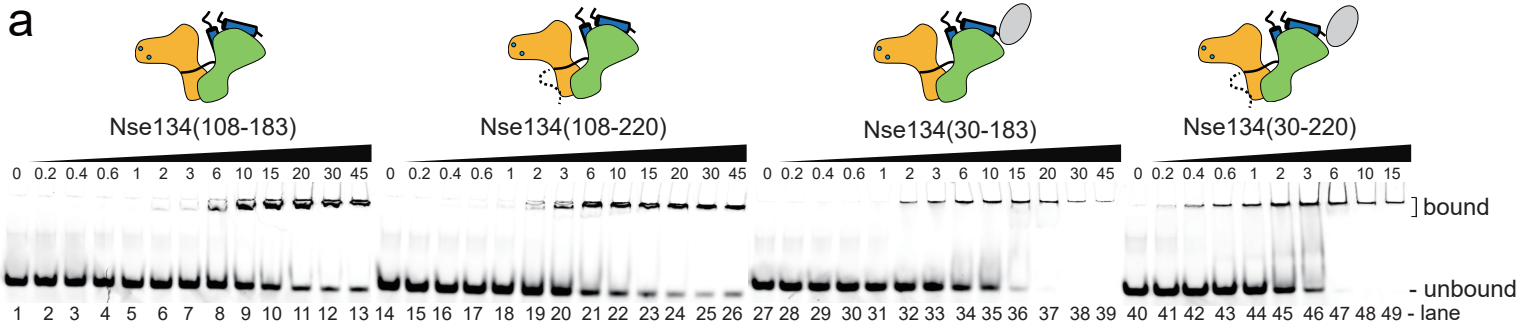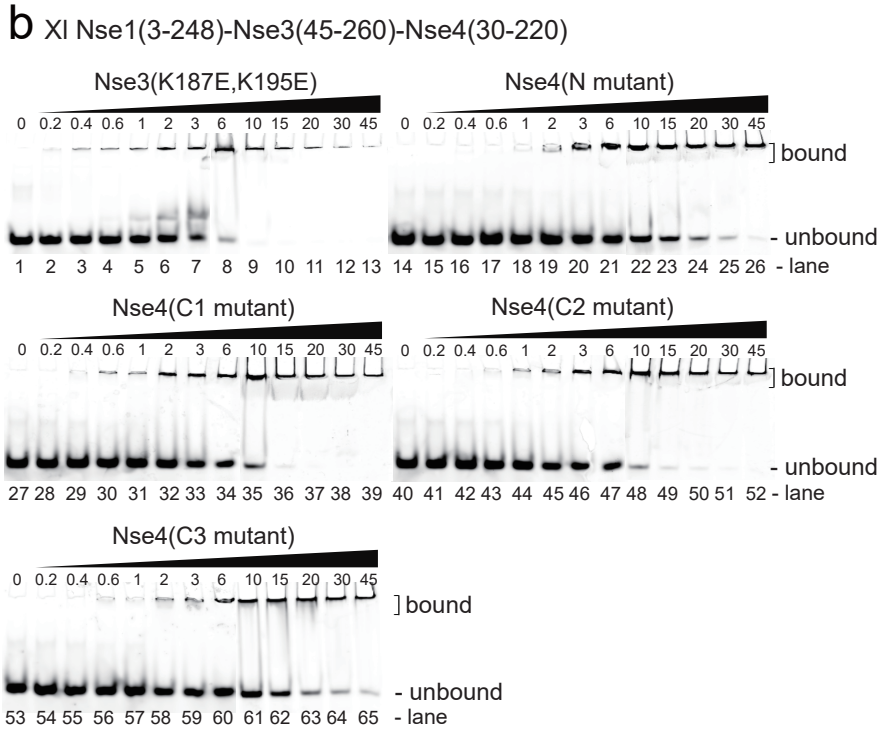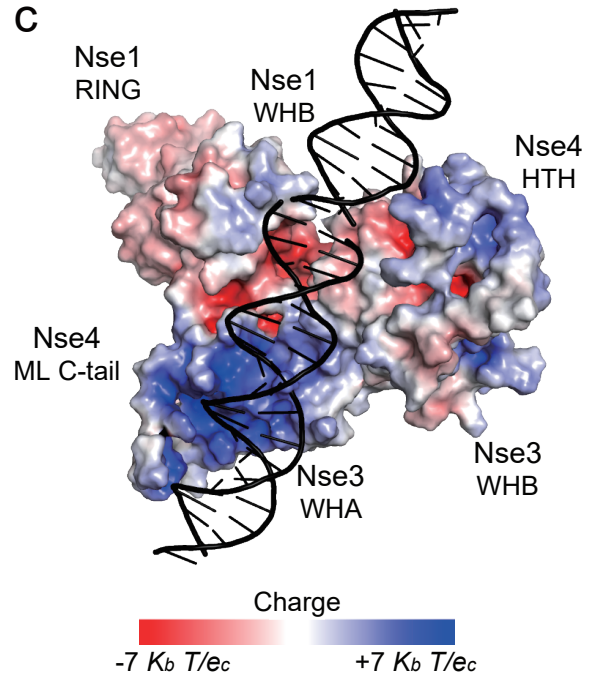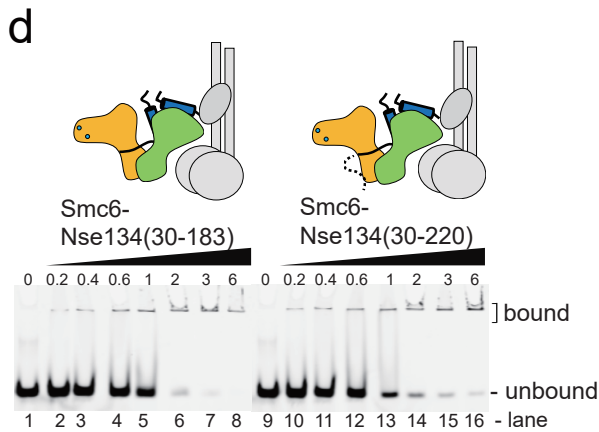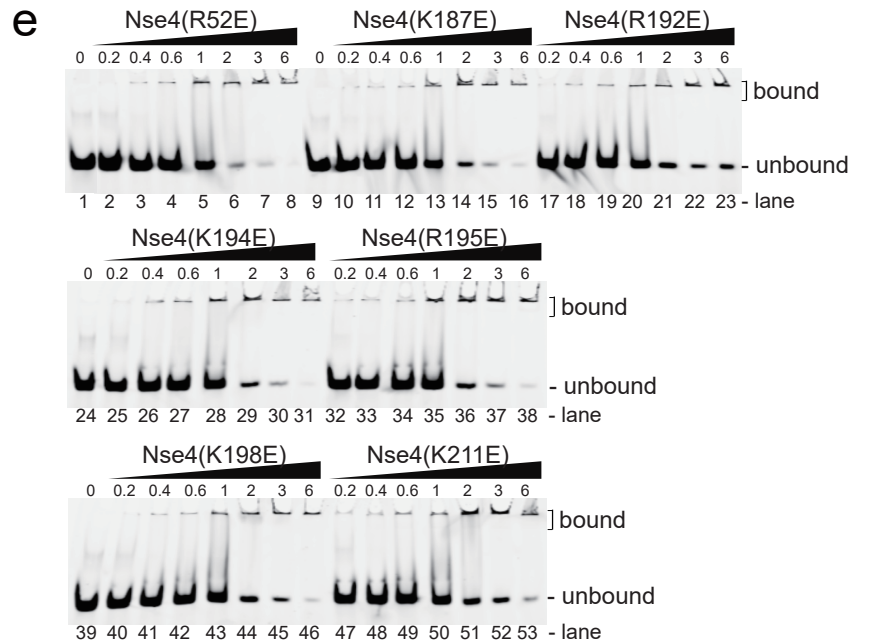

Figure S8

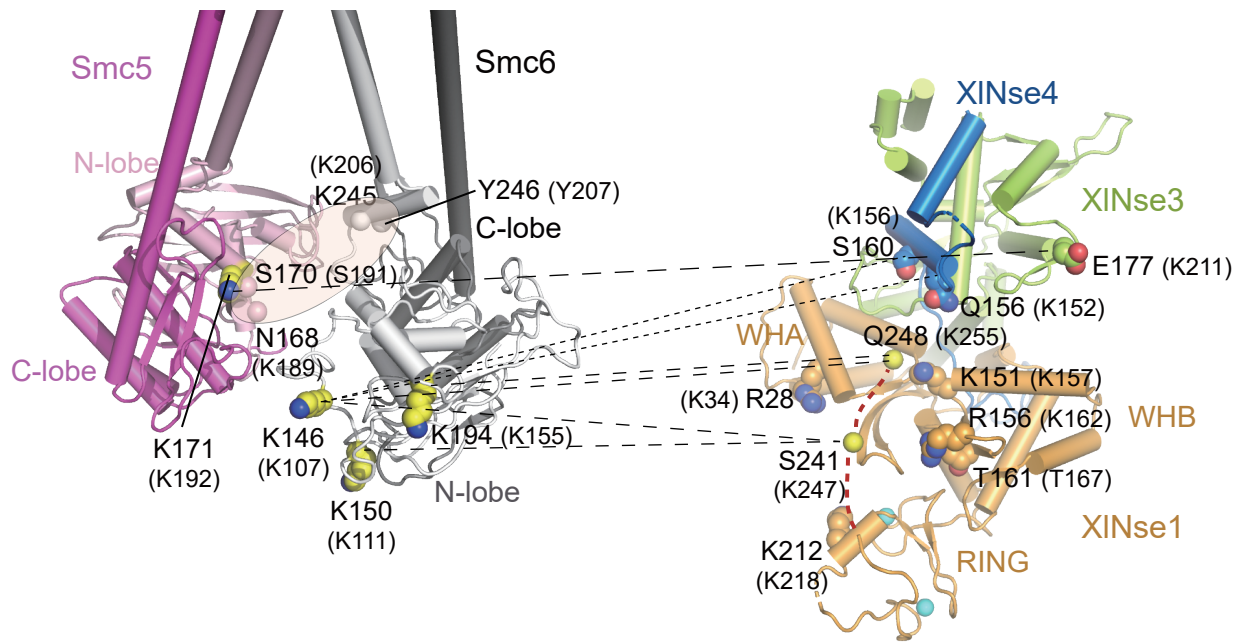

Figure S9

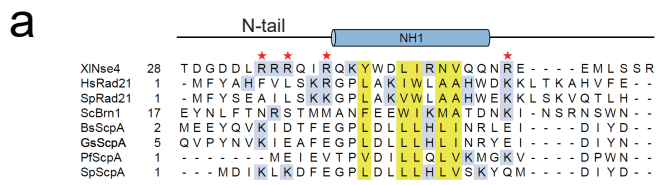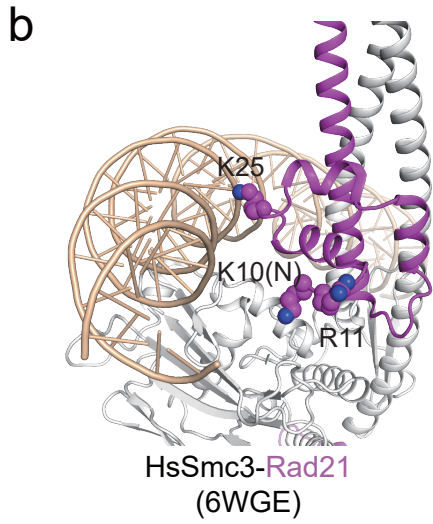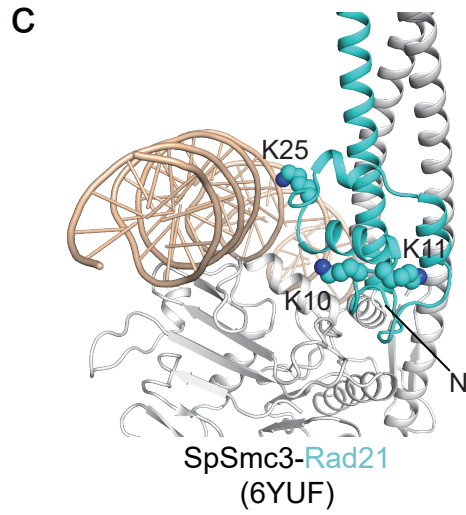

Figure S10
